# Supplementary material for: Radiotherapy for Adrenal Metastasis from Hepatocellular Carcinoma: A Multi-Institutional Retrospective Study (KROG 13-05)
Source: PLoS One. 2016 Mar 29;11(3):e0152642. doi: 10.1371/journal.pone.0152642 (PMC4811532; doi:10.1371/journal.pone.0152642)
Supplement: S1 File — This raw data excel file shows patients characteristics (age, gender, ECOG performance status, viral etiology, status of intrahepatic and extrahepatic diseases, tumor size, location of the tumor, alpha-fetoprotein level, and Child-Pugh class), summaries of the previous of treatments for intrahepatic HCC and radiotherapy for adrenal metastasis, treatment outcomes (response, acute/late toxicities), and survival data for entire patients (n = 134). (XLSX) [file pone.0152642.s001.xlsx]

## Sheet: Raw_data
No	Gender	Age	ECOG	Viral etiology	Intrahepatic control	Extrahepatic mets	Extrahepatic control	Interval from initial diagnosis to adrenal mets	Tumor size	Tumor location	AFP	Child-Pugh class	Previous treatment for intrahepatic HCC					Total dose	Fx size	BED	RT technique	Response	Acute toxicity (CTCAE v4.02)						Late toxicity (CTCAE v4.02)	Local failure status	LFFS	Survival status	OS
	1. Male	(years)	0	1. HBV	1. NED	0. no	1. NED	(month)	(cm)	1. right	(nl: 0-20)	1. A	TACE	Resection	RFA	PEIT	EBRT	(Gy)	(Gy)	(Gy10)	1. 3D	0. CR	fatigue	anorexia	nausea	vomiting	diarrhea	Maximum Grade	GI bleeding	(in-field, Adrenal)	(month)		(month)
	2. Female		1	2. HCV	2. viable, but SD	1. yes	2. viable, but SD		(long diameter)	2. left	(right before RT)	2. B	0. no	0. no	0. no	0. no	0. no				2. SBRT	1. PR								0. free	(from RT start)	0. alive	(from RT start)
			2	3. NBNC	3. uncontrolled		3. uncontrolled					3. C	1. yes	1. yes	1. yes	1. yes	1. yes				3. IMRT	2. SD								1. recur		1. death
			3									(right before RT)										3. PD
																						(RECIST)
																						(Best response)
1	1	49	0	1	2	0	1	4.6	4.5	1	34500	1	1	0	0	0	0	40	2.5	50	1	2	0	1	0	0	0	1	0	1	8.83333	1	17.7667
2	1	66	0	1	1	0	1	41.4333	3.7	1	42100	1	1	0	0	0	0	45	3	58.5	1	1	0	0	0	0	0	0	0	1	7.7	1	42.3667
3	1	53	1	1	2	1	2	0	7.5	1	700	1	1	0	0	0	0	45	3	58.5	1	2	1	0	0	0	0	1	0	0	1.66667	1	3.73333
4	1	72	2	3	1	1	2	2.4	4.9	1	155	1	1	0	0	0	0	30	3	39	1	1	1	2	0	0	0	2	0	0	8.5	1	12.9667
5	1	50	0	1	2	0	1	19.1333	3.8	2	2.9	1	1	0	0	0	0	45	3	58.5	1	1	0	0	0	0	0	0	0	1	9.6	1	68.3333
6	1	65	0	1	3	0	1	2.9	7	1	365	1	1	0	0	0	0	45	3	58.5	1	2	0	0	0	0	0	0	0	0	3.53333	1	6.3
7	1	68	0	1	2	1	3	26.3	5.6	1	402	1	1	0	0	0	0	45	2.5	56.25	1	2	0	1	0	0	0	1	0	0	9.7	1	14.7
8	1	59	1	1	3	1	2	0	7.3	1	17.2	1	1	0	0	0	0	43	3	55.4	1	2	1	0	1	1	2	2	0	0	12.0667	1	12.6
9	1	49	0	1	2	0	1	8.06667	5.8	2	47	1	1	0	0	0	0	50	2	60	1	2	0	0	0	0	0	0	0	1	6.03333	1	11.5667
10	1	54	1	1	3	1	3	5.1	7.8	1	3154	1	1	0	0	0	0	50	2.5	62.5	1	1	2	0	0	0	1	2	0	1	11.8	1	22.1
11	1	54	1	1	2	1	2	17.7	4.7	2	2910	1	1	0	0	0	0	50	2.5	62.5	1	2	2	0	1	1	0	2	0	0	4.96667	1	12.4333
12	1	66	0	1	3	0	1	12.1667	8	2	511	1	1	0	0	0	0	50	2.5	62.5	1	2	0	0	0	0	0	0	0	0	9.1	1	13.1333
13	1	60	1	1	3	0	1	0	5.2	1	281	1	1	0	0	0	0	39	3	50.7	1	1	1	0	0	0	0	1	0	1	9.76667	1	29
14	1	53	0	1	2	1	2	17.2333	6.5	1	5230	1	1	0	0	0	0	45	2.5	56.25	1	2	0	1	0	0	0	1	0	0	4.73333	1	6.36667
15	1	54	0	1	1	1	2	9.66667	5	2	10.9	2	1	0	1	0	0	51	3	66.3	1	2	0	0	0	0	0	0	2	1	17.5667	1	48.3
16	1	57	0	1	2	1	2	38.7	2.7	1	16.4	1	1	0	1	0	0	39	3	50.7	1	2	1	0	0	0	0	1	0	1	9.26667	1	17.4
17	1	51	0	1	3	1	3	0	9.5	2	83.3	1	1	0	0	0	0	54	3	70.2	1	1	0	0	1	0	0	1	0	0	10.4667	1	13.7
18	1	50	0	1	1	0	1	9.4	5.5	1	5.4	2	1	0	1	0	0	40	4	56	1	0	0	0	1	1	0	1	0	0	17.5	1	22.0667
19	1	57	1	1	3	0	1	2.46667	10	1	327000	3	1	0	0	0	0	45	3	58.5	1	2	1	2	1	0	0	2	0	0	1.3	1	2.36667
20	1	51	0	1	2	0	1	0	5.5	1	4510	1	1	0	0	0	0	45	2.5	56.25	1	2	0	0	2	0	0	2	0	1	5.36667	1	7.93333
21	1	59	1	1	1	0	1	15	2.8	2	20.6	1	1	0	0	0	0	50	5	75	1	2	0	0	0	0	0	0	0	0	5.7	1	12.2667
22	1	58	0	1	3	0	1	6.2	5.6	1	6520	1	1	1	0	0	0	48	4	67.2	1	2	0	0	0	0	0	0	0	0	1.53333	1	1.8
23	1	69	2	3	2	0	1	6	5.1	1	23.9	1	1	0	0	0	0	40	2.5	50	1	2	1	2	0	0	0	2	0	0	5.1	1	21.5333
24	1	61	2	1	3	0	1	46.7333	9.7	1	48600	1	1	0	0	0	1	40	2.5	50	1	1	0	0	0	0	0	0	0	0	7	1	7.8
25	1	63	0	1	2	0	1	1.73333	2.7	2	611	1	1	0	0	0	0	45	3	58.5	1	1	1	2	0	0	0	2	0	1	18	1	49.9
26	1	50	2	3	3	0	1	24.2	8.5	1	33.3	1	1	0	0	0	0	40	2.5	50	1	2	2	0	1	0	0	2	0	0	4.2	1	5.16667
27	1	76	0	1	2	0	1	73.3333	3.5	2	5.3	1	1	0	1	0	1	40	2.5	50	1	2	1	1	0	0	0	1	0	1	10.0667	1	17.6333
28	1	59	0	1	3	0	1	34.6333	7	1	61.3	1	1	0	0	0	0	25	2.5	31.25	1	2	0	2	0	0	0	2	0	0	9.2	0	12.1
29	1	73	0	1	3	0	1	15.2	5.4	2	625	1	1	0	0	0	0	40	2.5	50	1	2	0	0	0	0	0	0	0	1	9.2	1	13.2667
30	1	48	1	1	2	1	3	12.2667	5.9	1	70700	1	1	0	0	0	0	35	2.5	43.75	1	2	1	1	1	0	0	1	0	0	3.13333	1	5.53333
31	1	62	1	1	3	0	1	0	6.8	1	1110	1	1	0	0	0	0	40	2.5	50	1	2	1	1	1	0	1	1	0	0	5.46667	1	9.53333
32	1	67	1	3	2	0	1	15.0333	5.8	1	12.5	2	1	0	0	0	0	45	3	58.5	1	2	0	2	0	0	0	2	0	0	9	1	10.3
33	1	54	0	1	2	1	3	12.1	4.6	2	223	2	1	1	0	0	0	40	2.5	50	1	2	1	2	0	0	0	2	0	0	1.86667	1	3.36667
34	1	69	1	3	3	1	3	16.9333	5.2	1	4	1	1	1	0	0	0	40	2.5	50	1	2	0	1	1	0	0	1	0	0	4.3	1	8.76667
35	1	63	0	1	2	0	1	0	4.9	1	160	2	1	0	0	0	0	40	2.5	50	1	2	0	1	0	0	0	1	0	0	5	1	7.86667
36	1	63	0	1	2	0	1	82.4333	3.7	2	160	2	1	0	0	0	0	40	2.5	50	1	2	0	1	0	0	0	1	0	0	5	1	7.86667
37	1	44	0	1	2	1	2	16.9667	3.9	1	19000	1	1	1	0	0	0	45	3	58.5	1	2	0	0	0	0	0	0	0	1	1.5	1	13.2667
38	1	54	0	1	1	0	1	50.4333	2.4	1	1.2	1	0	0	0	0	0	50	2	60	1	0	0	0	0	0	0	0	0	0	52.0667	0	59.3333
39	1	54	0	1	1	0	1	50.4333	1.5	2	1.2	1	0	0	0	0	0	50	2	60	1	0	0	0	0	0	0	0	0	0	52.0667	0	59.3333
40	2	62	0	1	2	0	1	35.6667	3.8	2	25200	2	1	0	0	0	0	45	2.5	56.25	1	2	0	2	1	0	0	2	0	1	5.33333	1	6.76667
41	1	71	1	1	1	1	2	19.7	3.9	2	1.1	1	1	0	0	0	0	60	2	72	1	1	0	0	0	0	0	0	0	1	12.1333	1	16.9667
42	1	52	0	1	3	0	1	20.1	1.7	2	1.2	1	1	0	1	1	0	50	2	60	1	1	0	1	2	0	0	2	0	1	23.1667	1	28.6
43	1	56	1	1	3	0	1	8.6	2	1	14.8	1	1	0	0	0	0	48	4	67.2	1	0	0	0	0	0	0	0	0	0	17.4667	1	18.7333
44	1	57	1	1	3	0	1	17.3333	3.8	2	19.9	1	1	0	0	0	0	40	2.5	50	1	1	0	0	1	0	0	1	0	1	5.36667	1	6.63333
45	1	60	0	1	2	0	1	52	2.7	2	14.3	2	1	1	0	0	0	60	4	84	1	1	0	0	0	0	0	0	0	1	11.0333	1	15.4333
46	1	62	0	1	3	0	1	0	3.2	2	35.3	1	1	0	0	0	0	54	3	70.2	1	1	0	2	0	0	0	2	0	1	11.7333	0	52.8333
47	1	65	0	1	2	0	1	23.3	2.2	1	7.5	1	1	0	0	0	0	45	15	112.5	2	2	0	0	1	0	0	1	0	1	38.4	0	51.3667
48	1	65	2	1	3	1	2	17.7	7.7	2	404	2	1	0	1	0	0	20	2.5	25	1	2	3	2	0	0	2	3	0	0	1.33333	1	3
49	2	62	0	1	1	0	1	6.8	4.8	1	32.3	2	1	0	0	0	0	45	3	58.5	1	1	1	0	0	0	0	1	0	0	2.86667	1	6.43333
50	1	70	1	1	1	0	1	1.56667	2.2	1	38.6	1	1	0	1	0	0	45	2.5	56.25	1	2	1	0	0	0	0	1	0	1	16.7667	1	17.4
51	1	37	0	1	1	1	2	0	7.9	2	2870	1	1	1	0	0	0	50	2	60	1	2	0	0	0	0	0	0	0	0	23.2333	1	26.8333
52	1	63	1	2	2	1	2	0	2.5	1	72.5	2	1	0	0	0	1	40	2.5	50	1	1	1	2	0	0	0	2	0	0	2.23333	1	3.66667
53	1	47	1	1	2	0	1	0.533333	5.4	1	4174	1	1	1	0	0	0	44	2	52.8	1	2	0	2	0	0	0	2	0	0	1.03333	1	17.2333
54	1	67	0	1	1	0	1	13.5333	3	1	45.8	1	1	0	0	0	1	40	4	56	1	3	0	0	0	0	0	0	0	1	1.46667	0	8.93333
55	1	63	1	1	1	0	1	41.7667	6.4	1	1543.1	1	1	1	0	0	0	50	2	60	1	1	2	0	1	0	0	2	0	1	8.6	0	16.5667
56	1	46	0	1	2	0	1	4.2	3.2	2	2580.2	1	1	0	0	0	1	40	2.5	50	1	2	0	1	1	0	0	1	0	1	5.13333	1	7.13333
57	1	48	1	1	2	1	2	0	4.9	2	73.9	1	1	0	0	0	0	40	2.5	50	1	2	0	2	0	0	0	2	0	1	5.13333	1	9.46667
58	1	65	1	1	1	0	1	31.1667	5	1	4.8	1	1	1	0	0	0	50	2	60	1	2	0	1	1	0	0	1	0	0	13.5	0	13.7667
59	2	50	0	1	1	0	1	24.0333	3.5	1	46.8	1	1	0	1	0	0	50	2.5	62.5	1	0	0	0	0	0	0	0	0	0	9.5	0	12.7
60	2	65	1	1	3	1	2	6.36667	8.8	2	217.3	2	1	0	0	0	0	35	2.5	43.75	1	2	2	0	0	0	0	2	0	0	0.7	1	1.6
61	2	75	1	2	2	0	1	17.6667	2.9	1	17100	1	1	1	0	0	0	40	2.5	50	1	1	0	2	1	0	0	2	0	1	4.66667	1	5.16667
62	1	51	0	1	1	0	1	7.06667	2.6	2	6.3	1	1	1	0	0	0	45	2.5	56.25	1	2	0	1	1	0	0	1	0	0	9.43333	0	10.3667
63	1	70	2	1	3	0	1	2.3	7.2	1	26453	1	1	0	0	0	0	30	2.5	37.5	1	2	0	2	0	0	0	2	0	0	4.7	0	7.46667
64	1	47	2	1	3	1	3	6.83333	6.6	2	43576	1	1	1	0	0	0	40	2.5	50	1	1	1	1	1	0	0	1	0	0	0.833333	1	1.7
65	1	53	1	1	2	1	3	44.3667	4.5	1	12150	1	1	1	0	0	1	30	10	60	2	1	0	0	1	2	3	3	0	0	4.63333	1	5.56667
66	1	54	1	1	1	0	1	60.4333	3.4	2	3370	1	1	0	0	1	0	39	13	89.7	2	2	0	0	0	0	0	0	3	0	3.13333	1	15.1667
67	1	66	1	1	2	1	2	37.7333	2.7	2	5846	1	1	0	0	0	1	45	15	112.5	2	1	0	0	0	0	0	0	0	0	2.53333	1	4.66667
68	1	51	1	1	2	0	1	79.3333	7.8	1	2870	1	1	0	1	0	0	39	13	89.7	2	1	0	3	0	0	0	3	0	0	3.56667	1	6.4
69	1	54	0	1	3	1	3	0	3.4	2	1331.9	2	1	0	0	0	0	50.4	1.8	59.472	1	1	2	3	2	1	1	3	1	0	7.3	1	9.53333
70	1	50	1	1	2	1	3	15.7667	7.4	1	74.4	1	1	0	0	0	1	50	2	60	1	2	1	1	1	1	1	1	1	0	11.7667	1	15.4333
71	1	67	2	1	1	0	1	66.7	2.1	2	3.1	1	1	0	0	0	1	50	2.5	62.5	1	3	1	1	1	1	1	1	1	1	2.03333	1	8.33333
72	1	76	1	2	3	0	1	8.16667	6.2	2	220.5	1	1	0	0	0	0	46.8	1.8	55.224	1	2	1	1	1	1	1	1	1	0	6.1	1	10.8
73	1	63	1	1	3	0	1	0	5	1	97872.4	2	0	0	0	0	0	45	3	58.5	1	2	1	2	1	1	1	2	1	0	1.4	1	1.53333
74	1	54	1	1	3	1	3	0	8	1	75812.6	1	0	0	0	0	0	50	2.5	62.5	3	2	1	2	2	1	1	2	1	0	3.1	1	5.3
75	1	45	1	1	3	0	1	0	8.3	1	205.2	2	1	0	0	0	0	40	2.5	50	1	2	2	1	1	1	1	2	1	0	6.46667	1	7.03333
76	1	59	1	1	2	1	3	81.0667	1.2	2	3.8	1	1	0	0	0	1	50	2	60	1	2	1	1	1	1	1	1	1	0	6.86667	1	9.26667
77	1	54	1	1	2	1	3	0	9	2	6	1	1	0	0	0	0	50.4	1.8	59.472	1	2	1	1	2	1	1	2	1	0	6.06667	0	6.76667
78	1	57	1	1	3	0	1	5.4	4.9	1	1.1	1	1	0	0	0	0	45	1.8	53.1	1	2	1	1	1	1	1	1	1	0	2.93333	1	4.23333
79	1	62	0	1	2	0	1	59.1	2.8	2	5.4	1	0	0	0	0	0	50	2.5	62.5	1	2	0	0	0	0	0	0	0	1	9.36667	0	17.4667
80	1	70	0	1	2	0	1	57.3667	2.5	1	565.6	1	0	0	0	0	0	37.5	2.5	46.875	1	1	0	0	0	0	0	0	0	0	16.6	0	16.6
81	1	68	0	1	2	0	1	15.4333	4.8	1	2.8	1	0	0	0	0	0	35	2.5	43.75	1	2	0	1	0	0	0	1	0	1	8.23333	0	19.6
82	1	68	0	1	2	0	1	15.4333	6.6	2	2.8	1	0	0	0	0	0	35	2.5	43.75	1	2	0	1	0	0	0	1	0	.	.	0	19.6
83	1	47	3	1	2	0	1	7.53333	10.5	1	40819	2	0	0	0	0	0	30	3	39	1	2	0	0	0	0	0	0	0	0	9.66667	0	9.66667
84	1	74	1	1	2	0	1	5.6	6.1	1	36.2	1	0	0	0	0	0	51.9	2.5	64.875	1	1	0	1	2	0	0	2	3	1	6.8	0	14.7333
85	1	74	1	1	2	0	1	5.6	2.8	2	36.2	1	0	0	0	0	0	51.9	3.6	70.584	3	1	0	1	2	0	0	2	3	.	.	0	14.7333
86	1	40	3	1	3	0	1	0	8.1	2	26761	1	0	0	0	0	0	45	2.5	56.25	3	1	0	0	0	0	0	0	0	0	15.2667	0	15.2667
87	1	57	1	1	2	0	1	8.6	6.2	2	7747	1	0	0	0	0	0	45	3	58.5	1	1	0	2	1	0	0	2	0	0	24.8667	0	24.8667
88	1	53	2	1	2	0	1	80.2	2.5	2	50000	1	0	0	0	0	0	30	3	39	1	1	1	0	0	0	0	1	0	0	.	1	3.06667
89	1	64	1	1	2	0	1	10.3	7	1	13.9	1	0	0	0	0	0	48	2.4	59.52	1	1	2	1	0	0	0	2	0	0	.	0	5.33333
90	1	56	2	1	2	0	1	30.7	3	1	928.6	1	0	0	0	0	0	63.2	2	75.84	1	2	0	2	0	0	0	2	0	0	.	0	3.06667
91	1	66	0	1	2	0	1	7.23333	4	1	72.1	1	0	0	0	0	0	50.7	2.5	63.375	1	2	0	0	0	0	0	0	0	0	.	0	3.8
92	2	70	2	1	2	1	2	10.8333	3.8	1	1.5	1	0	0	0	0	0	39	3	50.7	1	2	0	2	0	0	0	2	0	0	.	0	1.1
93	2	70	1	1	2	0	1	73.1667	15	1	3890	1	0	0	0	0	0	42.2	2.2	51.484	1	2	2	1	0	0	0	2	0	0	.	1	4.3
94	1	49	1	1	2	1	2	26.7667	9	1	25.6	2	0	0	0	0	0	57.5	2.3	70.725	3	2	0	2	0	0	0	2	0	0	.	0	5.23333
95	1	54	0	1	3	1	3	4.43333	1.2	1	15.2	1	1	0	0	0	0	44	2.5	55	1	3	0	0	0	0	0	0	3	1	4.16667	1	10.6
96	1	66	0	1+2	3	1	3	5.9	2.3	1	9.7	1	1	0	0	0	0	36	3	46.8	1	3	0	0	0	0	0	0	0	1	0.866667	1	6.86667
97	1	44	2	1	3	0	1	6.7	4.3	1	4.7	1	1	1	0	0	0	30	3	39	1	1	0	0	0	0	0	2	0	1	6.53333	1	10.3667
98	1	59	1	2	3	0	1	0.866667	4.5	2	3	1	1	0	0	0	1	35	2.5	43.75	1	1	0	0	0	0	0	0	0	1	6.23333	1	35.3
99	1	73	1	2	3	0	1	4.93333	2.5	1	35034.8	1	1	0	0	0	0	35	2.5	43.75	1	2	0	0	0	0	0	0	0	1	6.5	1	10.5
100	1	61	1	1	3	0	1	59.1	1.5	1	4.5	1	1	1	0	0	0	45	3	58.5	1	3	0	0	0	0	0	1	0	0	.	1	9.63333
101	1	46	1	1	3	1	3	16.4	1.1	1	2662	1	1	1	0	0	0	54	2	64.8	1	2	0	0	0	0	0	0	0	0	.	1	10.3
102	1	71	0	3	3	0	1	0	1.3	1	143.3	1	1	0	0	0	0	66	3	85.8	1	2	0	0	0	0	0	0	0	0	.	1	18.7
103	1	54	0	3	1	0	1	14.7667	2.5	1	1.8	1	1	0	0	1	0	60	2	72	1	1	0	0	0	0	0	0	0	1	9.86667	0	50.8667
104	1	35	2	1	3	1	3	0	12.6	1	294000	2	1	0	0	0	1	30	3	39	1	1	0	0	2	2	0	2	0	1	9.7	1	18.0333
105	1	39	0	1	3	0	1	14.1	4.5	2	8	1	1	1	0	0	0	45	3	58.5	1	1	0	1	1	0	0	1	0	1	9.83333	1	11.7333
106	1	69	2	2	2	1	2	70.8667	5.2	1	109	1	1	0	0	0	0	56	2	67.2	1	3	1	1	0	0	0	1	0	1	2.56667	1	11.6667
107	1	48	1	1	2	1	1	22.1	2.6	2	197.8	1	1	1	0	0	0	54	2	64.8	1	1	2	1	1	0	0	2	0	0	.	1	6.56667
108	1	71	1	1	1	0	1	9.5	2.9	1	3	1	1	1	0	0	0	60	2	72	1	1	2	1	2	0	0	2	0	1	7.36667	1	13.2
109	1	50	0	1	1	0	1	25.3333	10.5	2	430	1	1	1	0	0	0	45	1.8	53.1	3	1	1	1	2	0	0	2	0	1	10.5	0	23.3333
110	1	51	0	1	1	1	3	47.5667	6.2	2	391	1	1	1	0	0	1	27.5	5.5	42.625	2	3	0	0	0	0	0	0	0	1	1.33333	0	10.9
111	1	61	1	1	2	0	1	8.93333	12.3	2	2102	2	1	0	0	0	0	64	2.5	80	3	2	1	1	0	0	0	1	0	0	.	1	2.66667
112	1	53	1	1	2	0	1	16.7	8.1	1	29	1	1	0	0	0	0	61.2	1.8	72.216	1	2	1	1	0	0	0	1	0	0	.	1	4.83333
113	1	53	1	1	2	0	1	16.7	10.1	2	29	1	1	0	0	0	0	61.2	1.8	72.216	1	2	1	1	0	0	0	1	0	0	.	1	4.83333
114	1	47	1	1	1	1	3	12.7333	4.3	2	143.9	1	1	1	0	0	1	50	2	60	1	1	1	1	0	0	0	1	0	1	3.76667	1	9.6
115	1	68	1	1	2	0	1	0.866667	2.4	2	430.1	1	1	0	0	0	0	45	2.5	56.25	1	2	1	2	0	0	0	2	0	0	.	0	5.06667
116	1	75	1	1	3	1	3	21.3333	4.2	1	185.6	1	1	0	0	0	0	33	7	56.1	2	2	0	0	0	0	0	0	0	1	5.66667	0	17.7667
117	2	55	1	1	2	1	3	10.5667	5	1	.	1	1	1	0	0	0	30	10	60	2	2	0	0	2	2	0	2	0	0	22.3	0	22.3
118	1	59	1	1	2	1	3	7.13333	4.3	1	196.2	1	1	1	0	0	0	30	10	60	2	2	0	2	2	0	0	2	0	0	28.3	1	28.3
119	1	41	2	1	2	0	1	20.3	2.5	1	586.7	1	1	1	0	0	0	45	3	58.5	1	1	0	0	1	0	0	1	0	1	16.3667	1	49.6333
120	1	62	0	1	1	1	2	18.1667	2.5	1	47.6	1	1	1	0	0	0	36	3	46.8	1	x	0	0	1	0	1	1	0	.	.	1	2.4
121	1	62	1	3	3	1	2	10.0333	5.8	1	6890	1	1	0	0	0	0	54	3	70.2	1	1	0	0	0	0	0	0	0	0	2.26667	1	5.26667
122	1	62	0	1	2	0	1	13.7	7	1	60078.5	1	1	1	0	0	0	50	2.5	62.5	1	1	0	0	1	0	0	1	0	0	5.13333	1	7.53333
123	1	65	0	1	1	0	1	30.1	2.3	1	1.3	1	0	1	1	0	0	54	3	70.2	1	0	1	1	0	0	0	1	2	1	28	1	98.5
124	1	45	1	1	2	0	1	9.53333	4.7	1	6	1	1	0	1	0	0	50	2.5	62.5	1	2	0	0	1	0	1	1	1	0	5.9	1	13.4333
125	1	55	1	1	1	0	1	24.9	4.7	1	5.2	1	1	0	0	0	0	40	2.5	50	1	3	1	0	0	0	0	1	0	1	2.46667	1	39.4333
126	2	64	2	1	2	0	1	10.8	3.1	1	13.1	1	1	0	0	0	0	40	2.5	50	1	2	0	0	0	0	0	0	0	1	6.6	1	12.1667
127	1	67	2	1	1	0	1	22.7667	3.4	1	3643	1	1	0	0	0	0	40	2.5	50	1	2	1	1	1	0	0	1	0	0	30.6	1	40.4
128	1	64	1	1	2	0	1	7.6	3.8	1	99.6	1	1	0	0	0	0	36	3	46.8	1	2	0	0	1	0	0	1	0	1	5.93333	1	7.83333
129	1	45	0	1	1	1	1	5.93333	1.7	1	4.3	1	0	1	0	0	0	54	3	70.2	1	1	0	0	0	0	1	1	0	0	104.167	0	104.167
130	1	53	1	1	2	0	1	18.4333	5.7	1	10.5	1	1	0	0	0	0	36	3	46.8	1	1	0	0	0	0	0	0	3	1	5.3	1	9.9
131	1	52	2	1	1	0	1	13.3333	4	1	71.5	2	1	0	0	0	1	36	3	46.8	1	1	0	0	0	0	0	0	0	0	3.5	1	9.33333
132	1	63	1	1	0	1	2	106.233	7	2	451.9	1	1	1	1	0	0	40	2.5	50	1	1	0	0	0	0	0	0	0	1	16.5667	1	23.3667
133	1	68	1	1	1	0	1	7.43333	.	1	76.3	1	1	0	0	0	0	36	3	46.8	1	2	0	0	0	0	0	0	0	0	3.76667	1	4.53333
134	1	55	1	1	3	0	1	18.8667	3.6	2	189744	1	1	0	0	0	0	45	3	58.5	1	1	1	0	0	0	1	1	0	0	6.36667	1	7.86667
135	1	49	1	1	3	0	1	4.6	3.4	2	249.7	1	1	0	0	0	1	30	3	39	1	2	0	1	1	0	0	1	0	1	3	1	22.0333
136	1	56	1	1	2	0	1	66.9667	.	2	338	1	1	0	0	0	0	30	3	39	1	3	0	0	0	0	0	0	0	1	1.73333	1	4.93333
137	1	41	0	2	1	1	2	13.6333	12	2	22599	1	0	1	0	0	0	30	3	39	1	2	0	0	0	0	0	1	0	0	1.2	1	3.33333
138	1	40	1	1	2	0	1	9	4.8	1	89.3	1	1	0	0	0	0	45	4.5	65.25	1	1	0	0	0	0	0	0	0	1	5.96667	1	12.8333
139	1	70	0	3	2	1	2	7.33333	4	2	86.3	1	1	1	0	0	0	50	5	75	3	1	0	0	1	0	0	1	0	0	2	1	16.8
140	2	47	1	1	2	0	1	16.3333	1	1	399.1	1	1	0	1	1	0	50	5	75	1	2	0	0	0	0	0	0	0	1	3.33333	0	3.56667
141	1	61	0	1	2	0	1	82.9	5.2	2	12.7	1	1	1	1	0	0	50	5	75	3	2	0	0	1	0	0	1	0	1	2.83333	0	11.8333
142	1	70	0	2	2	0	1	13.3667	1.8	2	23.2	1	1	0	0	0	0	45	15	112.5	1	2	0	0	0	0	0	0	0	0	13.2667	0	14.9667
same patients (patients who had bilateral adrenal glands metastases
